# Supplementary material
Source: publisher figshare collection journal article supplement (https://frontiersin.figshare.com/ndownloader/files/18037109)
Supplement: Supplementary file [file 18037109]

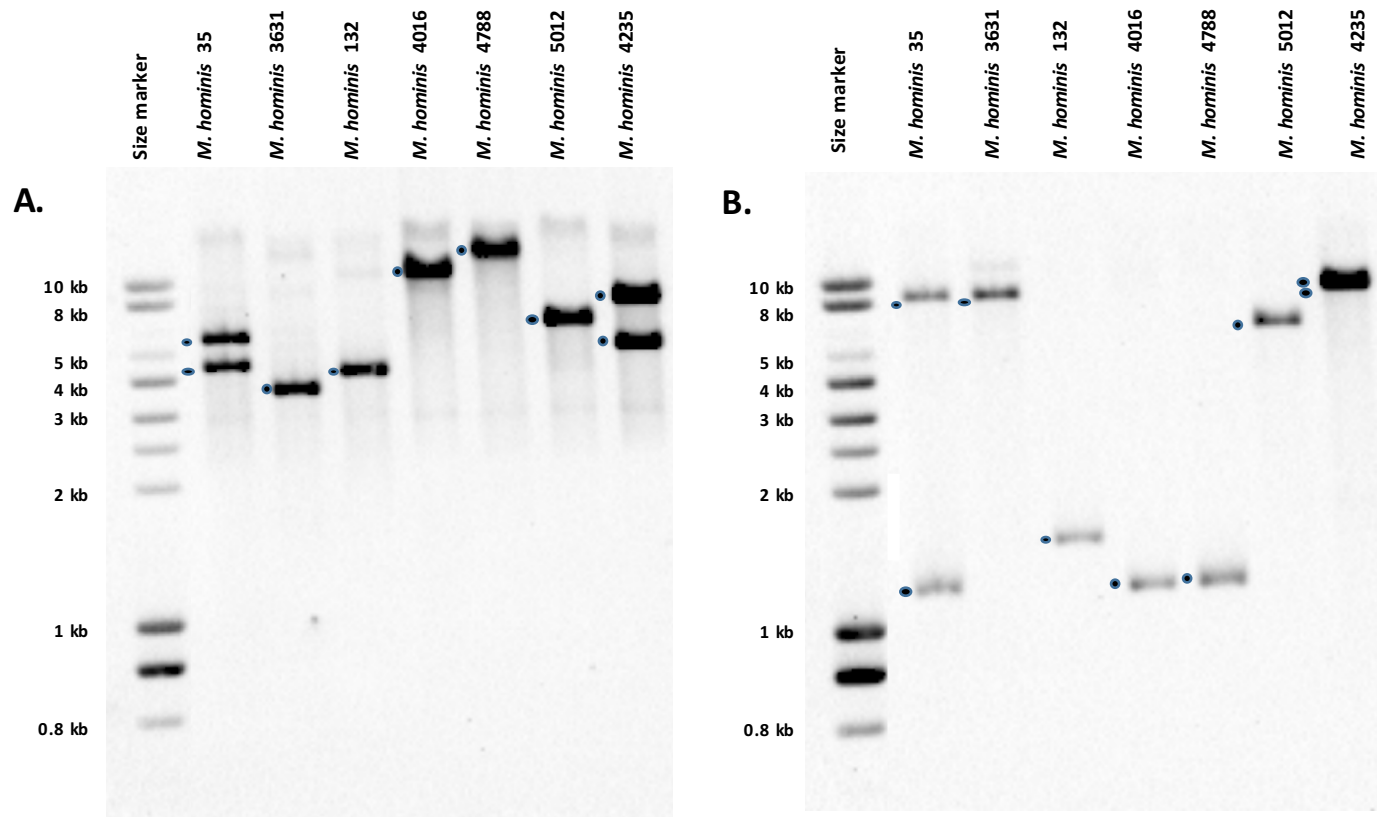

**Figure S2. Southern blotting analysis of the seven fully sequenced *M. hominis* strains harboring complete ICEHos.**

(A) Genomic DNA digested with *EcoRV* and probed with digoxigenin-labelled CDS1 gene probe.

(B) Genomic DNA digested with *EcoRV* and probed with digoxigenin-labelled CDS22 gene probe. Dots indicate the fragment displaying the expected size and corresponding to the ICEHs described in this study.
